# Supplementary material for: Identifying lncRNA-mediated regulatory modules via ChIA-PET network analysis
Source: Springer Nature journal article supplement (doi:10.1186/s12859-019-2900-8), 2019-05-29
Supplement: 12859_2019_2900_MOESM1_ESM.pdf [file 12859_2019_2900_MOESM1_ESM.pdf]

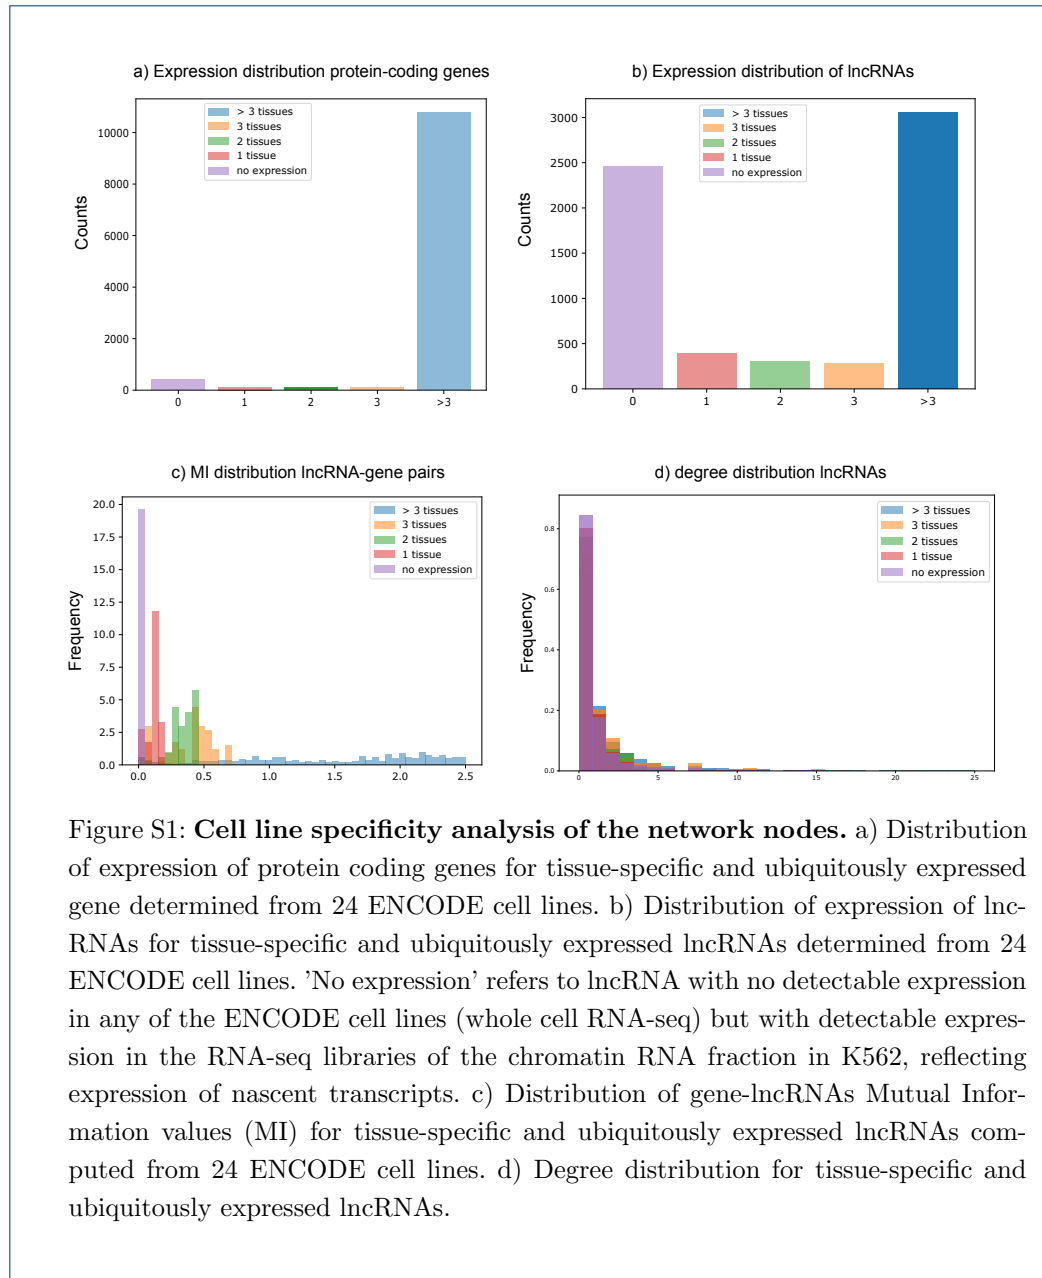

Figure S1: **Cell line specificity analysis of the network nodes.** a) Distribution of expression of protein coding genes for tissue-specific and ubiquitously expressed gene determined from 24 ENCODE cell lines. b) Distribution of expression of lncRNAs for tissue-specific and ubiquitously expressed lncRNAs determined from 24 ENCODE cell lines. 'No expression' refers to lncRNA with no detectable expression in any of the ENCODE cell lines (whole cell RNA-seq) but with detectable expression in the RNA-seq libraries of the chromatin RNA fraction in K562, reflecting expression of nascent transcripts. c) Distribution of gene-lncRNAs Mutual Information values (MI) for tissue-specific and ubiquitously expressed lncRNAs computed from 24 ENCODE cell lines. d) Degree distribution for tissue-specific and ubiquitously expressed lncRNAs.

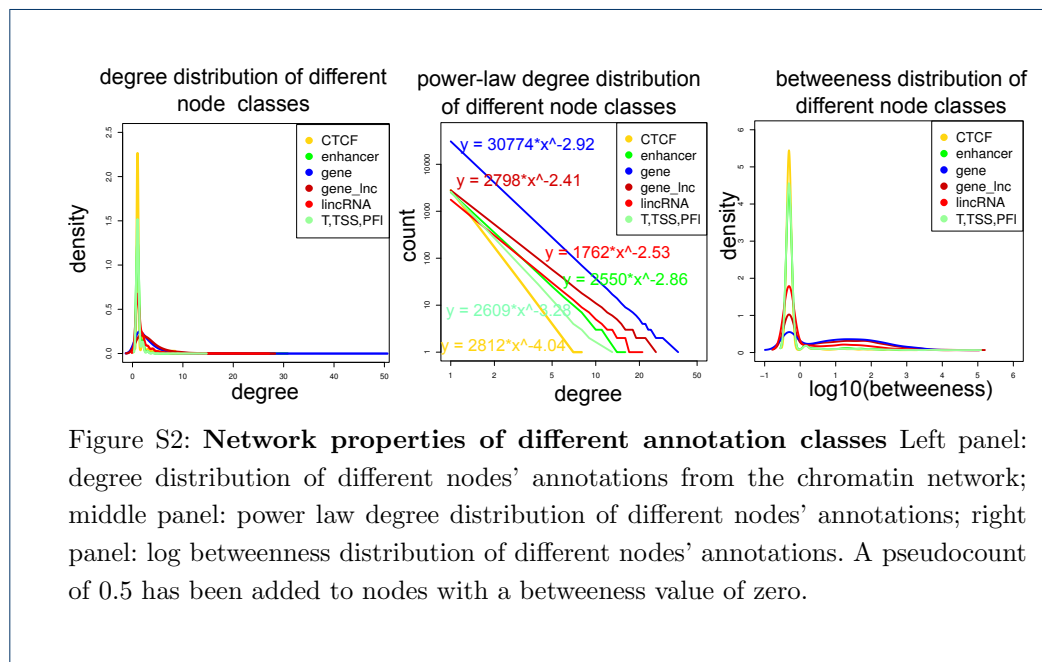

Table S1: Network properties of different genomic regions

| annotation | min_d | q1_d | median_d | mean_d | q3_d | max_d | min_b | q1_b | median_b | mean_b | q3_b   | max_b    |
|------------|-------|------|----------|--------|------|-------|-------|------|----------|--------|--------|----------|
| CTCF       | 1     | 1    | 1        | 1.09   | 1    | 8     | 0     | 0    | 0        | 3.34   | 0      | 1410     |
| enhancer   | 1     | 1    | 1        | 1.18   | 1    | 30    | 0     | 0    | 0        | 31.5   | 0      | 61845    |
| gene       | 1     | 1    | 2        | 2.78   | 4    | 49    | 0     | 0    | 3        | 211.67 | 51     | 62024.27 |
| gene_lnc   | 1     | 2    | 3        | 3.51   | 4    | 26    | 0     | 0    | 12       | 236.41 | 85.375 | 27307.88 |
| lincRNA    | 1     | 1    | 1        | 1.87   | 2    | 26    | 0     | 0    | 0        | 134.99 | 4.895  | 45314.76 |
| T,TSS,PFI  | 1     | 1    | 1        | 1.14   | 1    | 14    | 0     | 0    | 0        | 30.52  | 0      | 84898.53 |
| unknown    | 1     | 1    | 1        | 1      | 1    | 1     | 0     | 0    | 0        | 0      | 0      | 0        |

For each genomic annotation we report minimum degree, 25% lower quantile of the degree distribution, median degree, mean degree, 75% upper quantile of the degree distribution and maximum degree. The same quantities are reported for different annotations regarding the betweenness distribution.

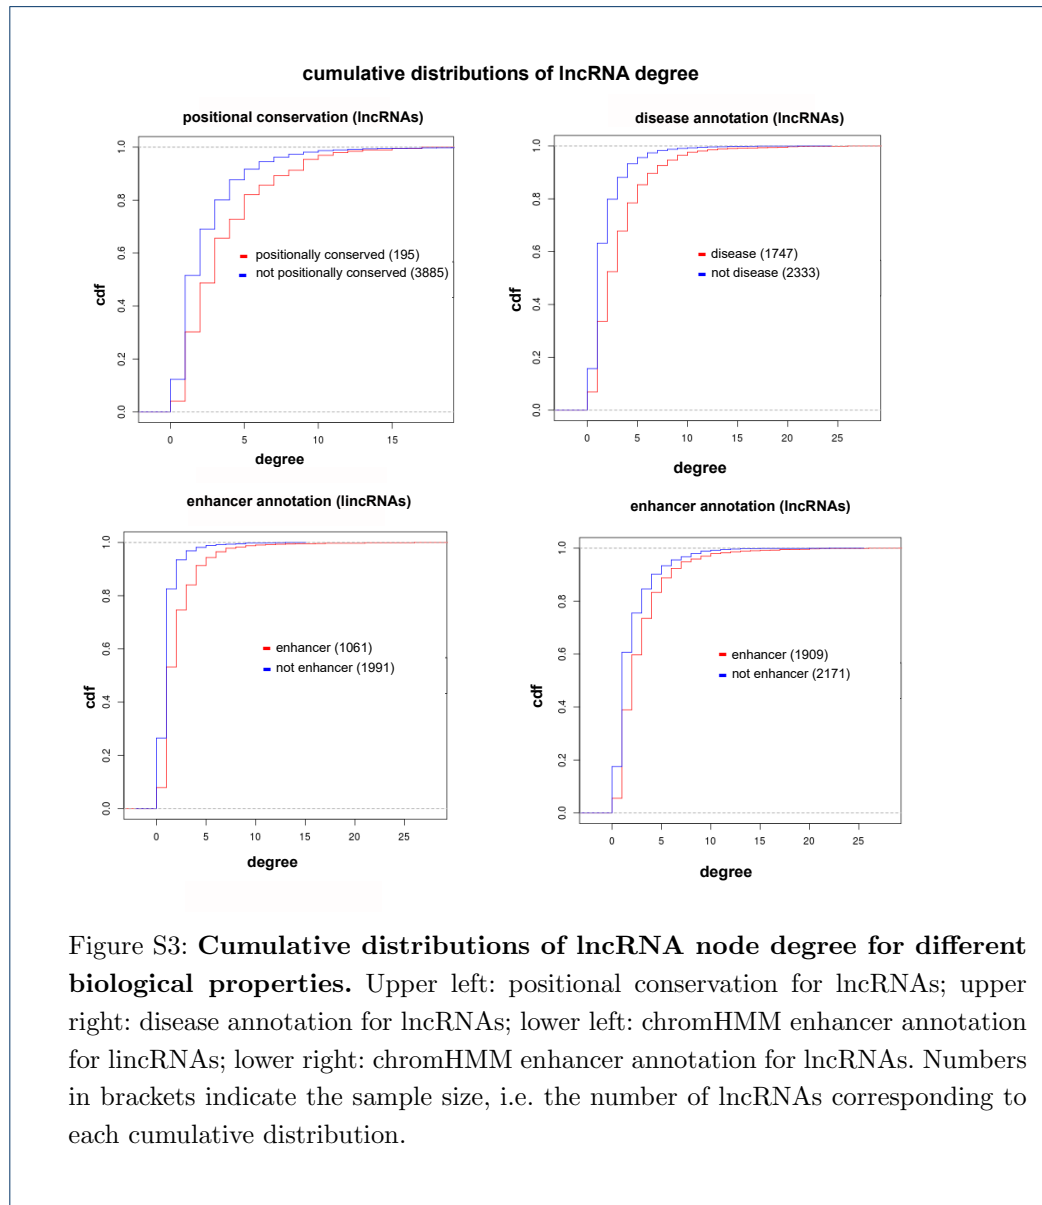

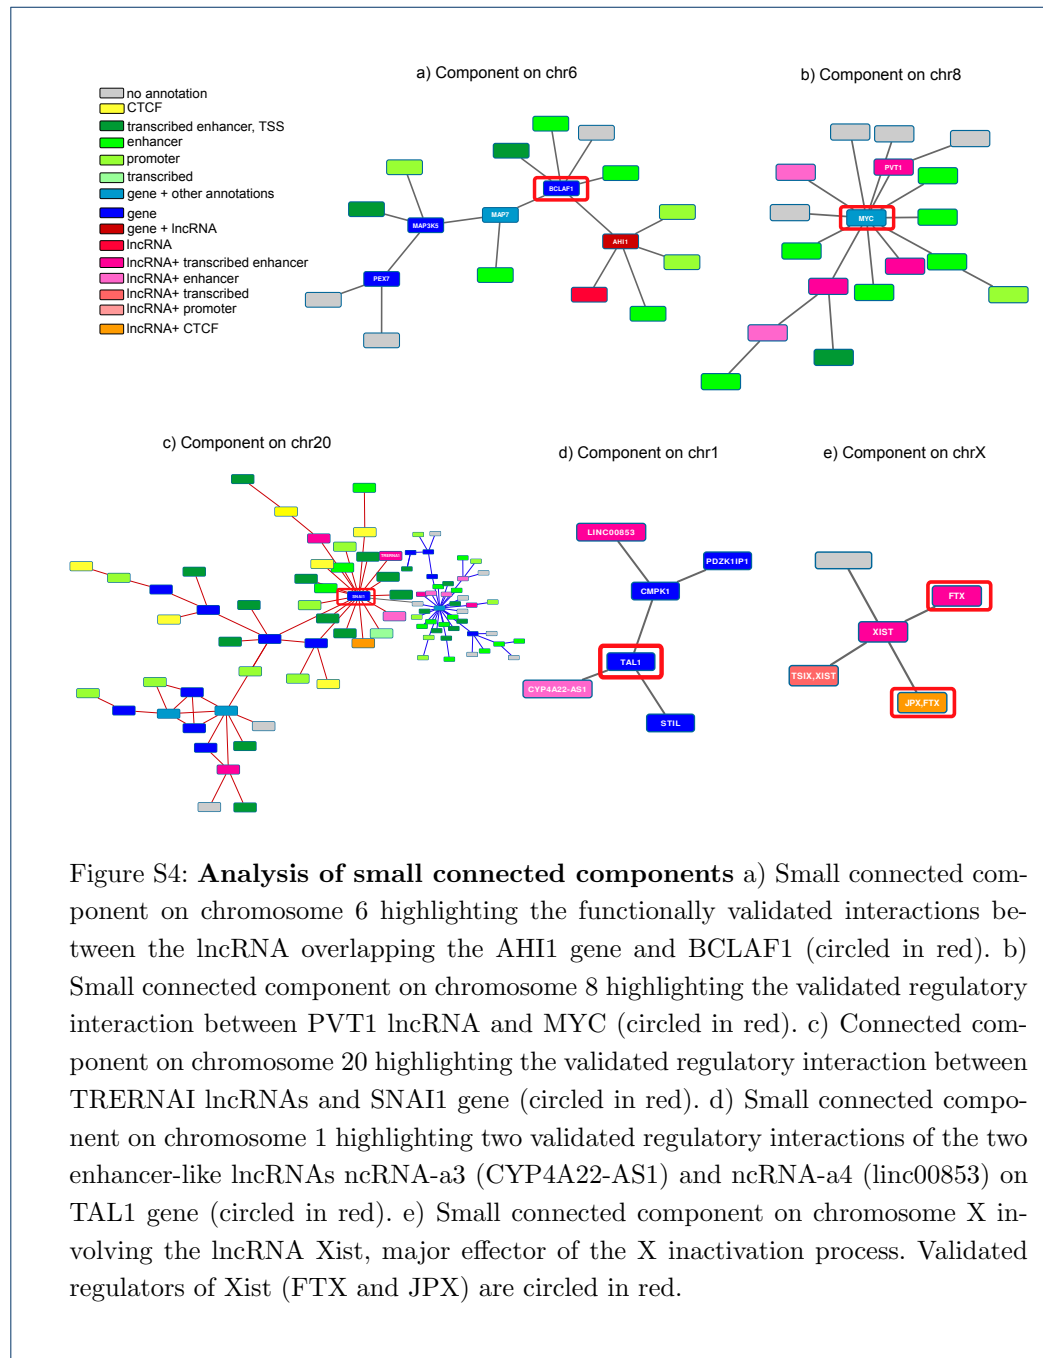

Table S2: Network properties of lincRNAs in the biggest connected component of chromosome 1

| lincRNA                      | degree | to_gene degree | betweenness | expression |
|------------------------------|--------|----------------|-------------|------------|
| RP11-442N24..B.1,RNU11       | 26     | 12             | 28958.62    | 5.465      |
| RP4-798A10.7                 | 21     | 6              | 32092.38    | 16.0232    |
| RP11-495P10.3                | 12     | 0              | 5456        | 1.0816     |
| SNHG12                       | 9      | 7              | 2514.22     | 229.3524   |
| RP11-458D21.1                | 9      | 6              | 22924.47    | 52.9613    |
| ADAMTSL4-AS1                 | 6      | 3              | 2249        | 50.9546    |
| FLJ37453                     | 5      | 3              | 4126.5      | 7.1451     |
| RP1-212P9.3                  | 4      | 1              | 397.41      | 0.5435     |
| RP11-337C18.8,RP11-337C18.10 | 3      | 1              | 250.67      | 0.044      |
| CH17-373J23.1                | 3      | 0              | 6056.3      | 35.8141    |
| SEC22B                       | 2      | 1              | 0           | 26.7178    |
| RP5-888M10.2                 | 2      | 2              | 0           | 1.2264     |
| RP5-1092A3.5                 | 2      | 1              | 0           | 2.3792     |
| RP4-798A10.2                 | 2      | 1              | 501         | 14.2565    |
| RP1-37C10.3                  | 2      | 2              | 0           | 0.1157     |
| RP11-474O21.5                | 2      | 2              | 0           | 111.6587   |
| RP11-337C18.10               | 2      | 0              | 249.33      | 0.0371     |

For each intergenic lincRNA we report its name (*lincRNA*), its degree centrality inside the connected component (*degree*), its degree centrality computed only from gene connections (*to-gene degree*), its betweenness (*betweenness*) and its expression value (RPKM) in the K562 cell line (*expression*).

Table S3: Network properties of lincRNAs in the biggest connected component of chromosome 17

| lincRNA                                    | degree | to_gene degree | betweenness | expression |
|--------------------------------------------|--------|----------------|-------------|------------|
| LINC00910                                  | 17     | 8              | 45314.76    | 37.0585    |
| SNHG16,RP11-666A8.8                        | 9      | 5              | 8527.74     | 73.5648    |
| LINC00854                                  | 8      | 3              | 1776.27     | 70.9481    |
| RP13-516M14.1,RP13-516M14.4                | 6      | 2              | 1834.12     | 62.6496    |
| RP11-1055B8.9                              | 6      | 4              | 513.68      | 9.3433     |
| RP11-400F19.8                              | 5      | 5              | 7618.89     | 3.1249     |
| RP13-766D20.4                              | 4      | 3              | 1130.2      | 1.2599     |
| LINC00482                                  | 4      | 2              | 348         | 15.868     |
| CTD-2020K17.1                              | 4      | 4              | 423.66      | 8.9101     |
| RP11-285E9.6                               | 3      | 2              | 1040        | 0.0321     |
| RP11-1055B8.3                              | 3      | 1              | 695         | 0.5555     |
| RP11-1055B8.10,RP11-1055B8.4               | 3      | 1              | 695         | 3.095      |
| CTD-3014M21.1                              | 3      | 0              | 35.83       | 6.4664     |
| RP11-666A8.8                               | 2      | 0              | 0           | 2.8546     |
| RP11-392O1.4                               | 2      | 1              | 10.47       | 0.0438     |
| RP11-358B23.1                              | 2      | 1              | 173.5       | 0.9049     |
| RP11-1055B8.3,RP11-1055B8.10,RP11-1055B8.4 | 2      | 1              | 348         | 0.5555     |
| MAP3K14-AS1                                | 2      | 1              | 348         | 12.5812    |
| CTD-2561B21.11                             | 2      | 1              | 348         | 8.7781     |

For each lincRNA we report its name (*lincRNA*), its degree centrality inside the connected component (*degree*), its degree centrality computed only from gene connections (*to-gene degree*), its betweenness (*betweenness*) and its expression value (RPKM) in the K562 cell line (*expression*).

Table S4: Network properties of lincRNAs in the biggest connected component of chromosome 11

| lincRNA    | degree | to_gene degree | betweenness | rpkm       |
|------------|--------|----------------|-------------|------------|
| MALAT1     | 8      | 6              | 4023.77     | 10426.3926 |
| NEAT1      | 6      | 4              | 361.67      | 1685.197   |
| MIR194-2HG | 2      | 2              | 0           | 3.3122     |

For each lincRNA we report its name (*lincRNA*), its degree centrality inside the connected component (*degree*), its degree centrality computed only from gene connections (*to-gene degree*), its betweenness (*betweenness*) and its expression value (RPKM) in the K562 cell line (*expression*).

Table S5: Fuzzy clustering or inter-modular nodes

| lincRNA       | chr   | type                  | expr  | degree |
|---------------|-------|-----------------------|-------|--------|
| RP11-661A12.5 | chr8  | linc_TSS              | 11.36 | 2      |
| RP11-838N2.5  | chr18 | linc_enhancer         | 0.65  | 6      |
| AC073842.19   | chr7  | linc_transcr_enhancer | 1.06  | 13     |
| RP11-400F19.8 | chr17 | linc_transcr_enhancer | 3.13  | 5      |
| RP13-516M14.1 | chr17 | linc_transcr_enhancer | 62.65 | 6      |
| RP11-388C12.5 | chr17 | linc_TSS              | 9.55  | 1      |
| RP4-798A10.2  | chr1  | linc_transcribed      | 14.26 | 1      |
| CH17-373J23.1 | chr1  | linc_promoter         | 35.81 | 3      |
| RP11-403I13.5 | chr1  | linc_enhancer         | 0.27  | 1      |
| CTD-2555K7.2  | chr14 | linc_transcr_enhancer | 1.1   | 2      |
| RP11-298I3.4  | chr14 | linc_CTCF             | 0.74  | 3      |
| RP11-57206.1  | chr3  | linc_transcribed      | 35.16 | 2      |
| U91328.21     | chr6  | linc_TSS              | 0.15  | 2      |

For each lincRNA we report its name (*lincRNA*), the chromosomal location (*chr*), its genomic annotation (*type*), its expression value (RPKM) in the K562 cell line (*expr*) and degree centrality (*degree*)
